# Supplementary material for: Robust light harvesting by a noisy antenna
Source: PubMed Central journal article supplement — Phys Chem Chem Phys. 2018 Jan 25;20(6):4360–72. doi: 10.1039/c7cp06139k (PMC5901068; doi:10.1039/c7cp06139k), 2018-01-25
Supplement: CP-020-C7CP06139K-s001.pdf [file CP-020-C7CP06139K-s001.pdf]

## Electronic Supplementary Information to Robust light harvesting by a noisy antenna

Pavel Malý,<sup>\*a,b</sup> Alastair T. Gardiner,<sup>c</sup> Richard J. Cogdell,<sup>c</sup> Rienk van Grondelle,<sup>a</sup> and Tomáš Mančal<sup>b</sup>

<sup>a</sup> Department of Biophysics, Faculty of Sciences, Vrije Universiteit, De Boeleaan 1081, 1081HV Amsterdam, The Netherlands,

\*E-mail: p.maly@vu.nl

<sup>b</sup> Faculty of Mathematics and Physics, Charles University, Ke Karlovu 3, 121 16 Prague, Czech Republic

<sup>c</sup> Institute of Molecular, Cellular and Systems Biology, College of Medical, Veterinary and Life Sciences, University of Glasgow, Glasgow G128QQ, United Kingdom

### Linear spectra

The expressions for the linear spectra are

$$\begin{aligned} ABS(\omega) &= \omega \sum_k |\mu_{kg}|^2 \mathcal{L}_g(\omega, \omega_k), \\ FL(\omega) &= \omega^3 \sum_k |\mu_{kg}|^2 P_k^{eq} \mathcal{L}_e(\omega, \omega_k). \end{aligned} \quad (1)$$

Here,  $\mu_{kg}$  are the one-exciton transition dipole moments,  $\mu_{kg} = \sum_n c_n^k \mu_n$ , and  $P_k^{eq}$  is the excited-state quasi-stationary equilibrium population of the  $k$ -th excitonic state (calculated by Boltzmann equilibrium, i.e. no nonsecular effects). The  $\mathcal{L}_{g/e}$  are the lineshapes arising from the propagation of the optical coherences  $\rho_{kg}(t)$  with the bath in the ground/excited state:

$$\mathcal{L}_g(\omega, \omega_k) = \int_0^\infty dt e^{i(\omega - \omega_k)t - g_{kkkk}(t) - \frac{\mathcal{R}_{kkkk}}{2}t}, \quad (2)$$

$$\mathcal{L}_e(\omega, \omega_k) = \int_0^\infty dt e^{i(\omega - \omega_k + 2i\lambda_{kkkk})t - g_{kkkk}^*(t) - \frac{\mathcal{R}_{kkkk}}{2}t}. \quad (3)$$

### Pump-probe spectra

The broadband pump-probe spectra are calculated in the doorway-window picture similar to<sup>??</sup>:

$$\begin{aligned} PP_{bb}(\omega, T) &= \sum_{k,n} \mathcal{L}_g(\omega, \omega_k) \langle \mu_{kg}, \mu_{kg}, \mu_{ng} \mu_{ng} \rangle_{\parallel} + \sum_{k,n} \mathcal{L}_e(\omega, \omega_k) \mathcal{U}_{kk,nn}(T) \langle \mu_{kg}, \mu_{kg}, \mu_{ng} \mu_{ng} \rangle_{\parallel} \\ &\quad - \sum_f \sum_{k,n} \mathcal{L}_f(\omega, \omega_{fk}) \mathcal{U}_{kk,nn}(T) \langle \mu_{fk}, \mu_{fk}, \mu_{ng} \mu_{ng} \rangle_{\parallel}. \end{aligned} \quad (4)$$

Here, the contributions are GSB, SE and ESA, respectively,  $\langle \bullet \rangle_{\Omega}$  denotes the orientational average, dependent on the polarization sequence employed. For the broadband pump-probe experiment parallel pulse orientation was used,  $\langle a, b, c, d \rangle_{\parallel} = \frac{1}{15} ((a \cdot b)(c \cdot d) + (a \cdot c)(b \cdot d) + (a \cdot d)(b \cdot c))$ . The lineshape for the two-one-exciton coherences is given by

$$\mathcal{L}_f(\omega, \omega_{fk}) = \int_0^\infty dt e^{i(\omega - \omega_{fk} + 2(\lambda_{ffkk} - \lambda_{kkkk}))t - g_{kkkk}(t) - g_{ffff}(t) + 2g_{ffkk}(t) - \frac{\Delta_{ffkk}}{2}t}, \quad (5)$$

where

$$\Delta_{ffkk} = \sum_{q \neq f} \sum_{n < m} \sum_{k < l} c_{nm}^f c_{nm}^q c_{kl}^q c_{kl}^f (\delta_{nk} v_n + \delta_{nl} v_n + \delta_{mk} v_m + \delta_{ml} v_m) C(\omega_{fq}) + \mathcal{R}_{kkkk} \quad (6)$$

is the 2-exciton lifetime broadening of the 2-1 exciton coherence, without the pure dephasing which is governed by the cumulant expansion. The lineshape functions transform as

$g_{ffkk}(t) = \sum_{n < m} \sum_l \left( c_{nm}^f \right)^2 \left( c_l^k \right)^2 (\delta_{nl} + \delta_{ml}) g(t)$ ,  $g_{ffff}(t) = \sum_{n < m} \sum_{k < l} \left( c_{nm}^f c_{kl}^f \right)^2 (\delta_{nk} v_n + \delta_{nl} v_n + \delta_{mk} v_m + \delta_{ml} v_m) g(t)$ . The narrowband pump, broadband probe spectrum was calculated as

$$\begin{aligned}
PP_{nb}(\omega, T, \omega_P) &= \sum_{k,n} \mathcal{L}_g(\omega, \omega_k) \mathcal{L}_{gp}(\omega_P, \omega_n) \langle \mu_{kg}, \mu_{kg}, \mu_{ng} \mu_{ng} \rangle_{m.a.} + \sum_{k,n} \mathcal{L}_e(\omega, \omega_k) \mathcal{U}_{kk,nn}(T) \mathcal{L}_{gp}(\omega_P, \omega_n) \langle \mu_{kg}, \mu_{kg}, \mu_{ng} \mu_{ng} \rangle_{m.a.} \\
&\quad - \sum_f \sum_{k,n} \mathcal{L}_f(\omega, \omega_{fk}) \mathcal{U}_{kk,nn}(T) \mathcal{L}_{gp}(\omega_P, \omega_n) \langle \mu_{fk}, \mu_{fk}, \mu_{ng} \mu_{ng} \rangle_{m.a.} .
\end{aligned} \tag{7}$$

Here, the selection of the doorway by the narrowband pump pulse is given by the lineshape including its apparent broadening by interaction with the finite pulse:

$$\mathcal{L}_{gp}(\omega_P, \omega_k) = \int_0^\infty dt e^{i(\omega_P - \omega_k)t - g_{kkkk}(t) - \frac{\mathcal{A}_{kkkk}}{2}t - \alpha \frac{t^2}{2}} . \tag{8}$$

This expression is valid for Gaussian pump pulses centered around  $\omega_P$  and of the envelope  $\propto e^{-\alpha t^2}$ . This is obtained by integrating the doorway in Eq. A2 of<sup>2</sup> over  $t'$  and holds only in strict factorization of the three propagation intervals in the 3rd-order nonlinear response calculation (e.g. no rise of the signal in the waiting time  $T$  due to finite pulse duration). The angle between the pump and probe was set to the magic angle  $54.7^\circ$ , yielding the isotropic contribution  $\langle a, b, c, d \rangle_{m.a.} = \frac{1}{9} (a \cdot b) (c \cdot d)$ . Both the narrow- and broadband calculated pump-probe traces are finally convoluted with a  $\sqrt{2}\tau_{pulse}$  wide Gaussian pulse to account for the initial signal decay during the action of the pulse. As we do not calculate the negative-time pathways, we plot only the  $T > 0$  part.

We note that, including the orientational averaging and averaging over an energetic disorder, the above-described calculation is on the edge of what is achievable on a modern desktop computer.

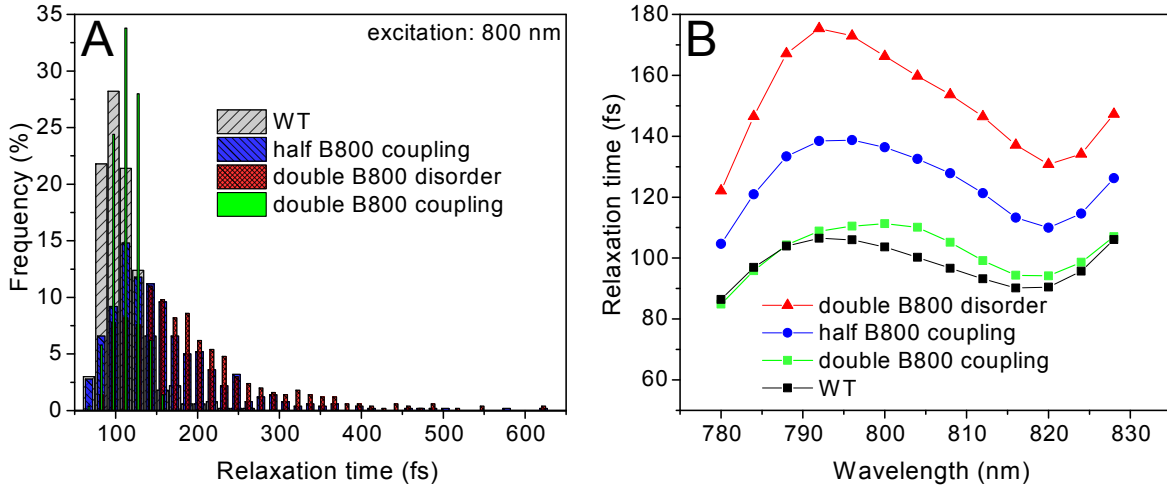

**Fig. S1** Energy relaxation in case of halved (blue) or doubled (green) inter-pigment coupling and doubled B800 ring energy disorder (red). Left: calculated relaxation time distribution excited at 800 nm, right: average relaxation time across the excitonic manifold.

## References

- V. I. Novoderezhkin, T. a. Cohen Stuart and R. van Grondelle, *J. Phys. Chem. A*, 2011, **115**, 3834–3844.  
W. M. Zhang, T. Meier, V. Chernyak and S. Mukamel, *J. Chem. Phys.*, 1998, **108**, 7763.

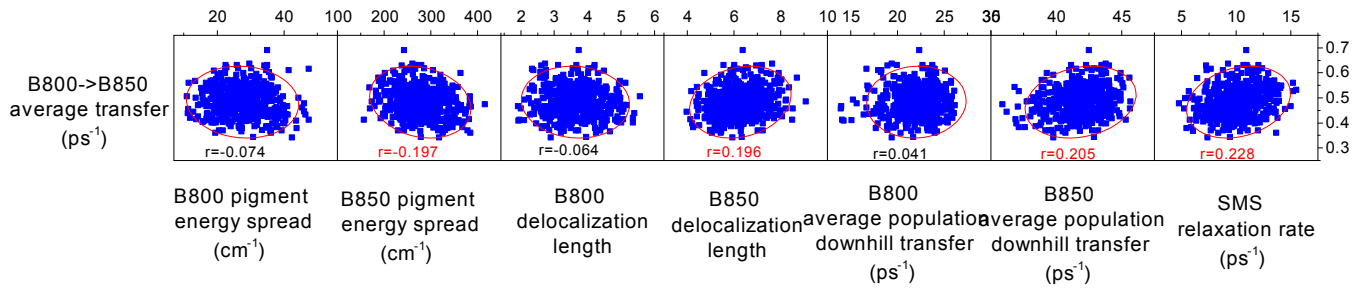

**Fig. S2** Correlation of thermally averaged B800->B850 intra-ring energy transfer with the quantities presented in Fig. 5 of the main text. The ellipses are 95% confidence ellipses, the numbers are Pearson's correlation coefficients, red values are  $p = 0.05$  significant correlations. The intra-ring transfer is calculated as  $\langle k_{800 \rightarrow 850} \rangle = \sum_{i \in B800, j \in B850} \frac{1}{Z} e^{-\frac{E_i - \lambda_i}{k_B T}} \mathcal{R}_{jj,ii}$ ,  $Z = \sum_{i \in B800} e^{-\frac{E_i - \lambda_i}{k_B T}}$

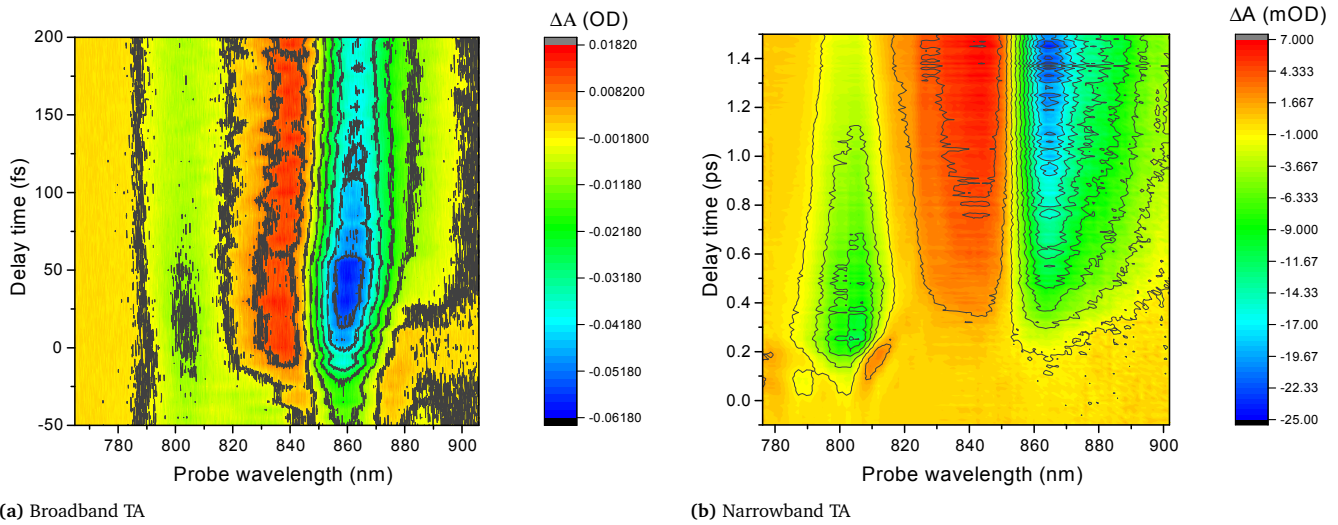

**Fig. S3** Measured broad- and narrowband transient absorption spectra

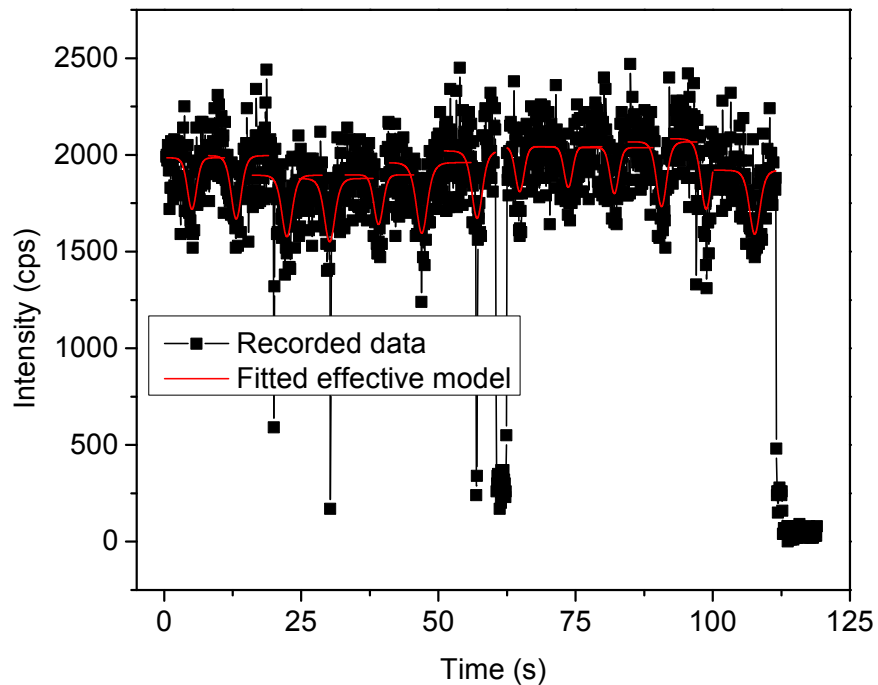

**Fig. S4** An exemplary intensity trace of a single LH2 exhibiting blinking behavior and stepwise photobleaching. The dark states are only briefly visited, the LH2 spends most time in the bright state.

|       |       |       |       |       |       |       |       |       |       |       |       |       |       |       |       |       |       |       |       |       |       |       |     |       |       |     |
|-------|-------|-------|-------|-------|-------|-------|-------|-------|-------|-------|-------|-------|-------|-------|-------|-------|-------|-------|-------|-------|-------|-------|-----|-------|-------|-----|
| 12320 | 355   | -48   | 13    | -6    | 3     | -2    | 1     | -1    | 1     | -1    | 1     | -2    | 2     | -6    | 11    | -51   | 299   | -4    | -1    | -1    | -1    | -1    | -2  | -4    | 25    | -11 |
| 355   | 12520 | 290   | -32   | 11    | -4    | 2     | -1    | 1     | 0     | 1     | 0     | 1     | -1    | 3     | -4    | 14    | -33   | 6     | 2     | 1     | 1     | 1     | 2   | 5     | 3     | -2  |
| -48   | 290   | 12320 | 372   | -51   | 14    | -6    | 3     | -2    | 1     | -1    | 1     | -1    | 1     | -2    | -6    | 11    | -11   | -4    | -1    | -1    | -1    | -1    | -3  | -4    | 26    |     |
| 13    | -32   | 372   | 12520 | 277   | -32   | 11    | -4    | 2     | -1    | 1     | 0     | 1     | 0     | 1     | -1    | 3     | -3    | 0     | 6     | 2     | 1     | 1     | 1   | 2     | 5     | 4   |
| -6    | 11    | -51   | 277   | 12320 | 360   | -50   | 13    | -6    | 3     | -2    | 1     | -1    | 1     | -1    | 1     | -2    | 2     | 25    | -12   | -4    | -1    | -1    | -1  | -3    | -4    |     |
| 3     | -4    | 14    | -32   | 360   | 12520 | 311   | -34   | 11    | -4    | 2     | -1    | 1     | 0     | 1     | 0     | 1     | -1    | 3     | 0     | 6     | 2     | 1     | 1   | 2     | 5     |     |
| -2    | 2     | -6    | 11    | -50   | 311   | 12320 | 381   | -52   | 14    | -6    | 3     | -2    | 1     | -1    | 1     | -1    | 1     | -4    | 27    | -11   | -4    | -1    | -1  | -3    | -4    |     |
| -1    | -1    | 3     | -4    | 13    | -34   | 381   | 12520 | 323   | -36   | 12    | -4    | 2     | -1    | 1     | 0     | 1     | 0     | 5     | 3     | -4    | 6     | 2     | 1   | 1     | 2     |     |
| -1    | 1     | -2    | 2     | -6    | 11    | -52   | 323   | 12320 | 374   | -51   | 14    | -6    | 3     | -2    | 1     | -1    | 1     | -3    | -4    | 27    | -10   | -4    | -1  | -1    | -3    |     |
| -1    | 0     | 1     | -1    | 3     | -4    | 14    | -36   | 374   | 12520 | 275   | -31   | 11    | -4    | 2     | -1    | 1     | 0     | 2     | 5     | 3     | -2    | 6     | 2   | 1     | 1     |     |
| -1    | 1     | -1    | 1     | -2    | 2     | -6    | 12    | -51   | 275   | 12320 | 371   | -51   | 14    | -6    | 3     | -2    | 1     | -1    | -3    | -4    | 26    | -10   | -4  | -1    | -1    |     |
| -1    | 0     | 1     | 0     | 1     | -1    | 3     | -4    | 14    | -31   | 371   | 12520 | 285   | -33   | 11    | -4    | 2     | -1    | 1     | 2     | 5     | 4     | -1    | 6   | 2     | 1     |     |
| -2    | 1     | -1    | 1     | -1    | 1     | -2    | 2     | -6    | 11    | -51   | 285   | 12320 | 388   | -51   | 14    | -6    | 3     | -1    | -1    | -3    | -4    | 25    | -12 | -4    | -1    |     |
| 2     | -1    | 1     | 0     | 1     | 0     | 1     | -1    | 3     | -4    | 14    | -33   | 388   | 12520 | 276   | -33   | 11    | -4    | 1     | 1     | 2     | 5     | 3     | 2   | 6     | 2     |     |
| -6    | 3     | -2    | 1     | -1    | 1     | -1    | 1     | -2    | 2     | -6    | 11    | -51   | 276   | 12320 | 383   | -53   | 14    | -1    | -1    | -1    | -3    | -4    | 25  | -10   | -4    |     |
| 11    | -4    | 2     | -1    | 1     | 0     | 1     | 0     | 1     | -1    | 3     | -4    | 14    | -33   | 383   | 12520 | 322   | -34   | 1     | 1     | 1     | 2     | 5     | 1   | -1    | 6     |     |
| -51   | 14    | -6    | 3     | -2    | 1     | -1    | 1     | -1    | 1     | -2    | 2     | -6    | 11    | -53   | 322   | 12320 | 360   | -1    | -1    | -1    | -1    | -3    | -3  | 25    | -11   |     |
| 299   | -33   | 11    | -3    | 2     | -1    | 1     | 0     | 1     | 0     | 1     | -1    | 3     | -4    | 14    | -34   | 360   | 12520 | 2     | 1     | 1     | 1     | 2     | 5   | 4     | -1    |     |
| -4    | 6     | -11   | 0     | 25    | 3     | -4    | 5     | -3    | 2     | -1    | 1     | -1    | 1     | -1    | 1     | -1    | 2     | 12520 | -23   | -3    | -1    | 0     | 0   | -1    | -2    |     |
| -1    | 2     | -4    | 6     | -12   | 0     | 27    | 3     | -4    | 5     | -3    | 2     | -1    | 1     | -1    | 1     | -1    | 1     | -23   | 12520 | -23   | -3    | -1    | 0   | 0     | -1    |     |
| -1    | 1     | -1    | 2     | -4    | 6     | -11   | -4    | 27    | 3     | -4    | 5     | -3    | 2     | -1    | 1     | -1    | 1     | -3    | -23   | 12520 | -24   | -3    | -1  | 0     | -1    |     |
| -1    | 1     | -1    | 1     | -1    | 2     | -4    | 6     | -10   | -2    | 26    | 4     | -4    | 5     | -3    | 2     | -1    | 1     | -1    | -3    | -24   | 12520 | -22   | -2  | -1    | 0     |     |
| -2    | 1     | -1    | 1     | -1    | 1     | -1    | 2     | -4    | 6     | -10   | -1    | 25    | 3     | -4    | 5     | -3    | 2     | 0     | -1    | -3    | -22   | 12520 | -22 | -2    | -1    |     |
| -2    | 2     | -1    | 1     | -1    | 1     | -1    | 1     | -2    | 4     | 6     | -12   | 2     | 25    | 1     | -3    | 5     | 0     | 0     | -1    | -2    | -22   | 12520 | -21 | -2    | -1    |     |
| -4    | 5     | -3    | 2     | -1    | 1     | -1    | 1     | -1    | 1     | -1    | 2     | -4    | 6     | -10   | -1    | 25    | 4     | -1    | 0     | 0     | -1    | -2    | -21 | 12520 | -22   |     |
| 25    | 3     | -4    | 5     | -3    | 2     | -1    | 1     | -1    | 1     | -1    | 1     | -1    | 2     | -4    | 6     | -11   | -1    | -2    | -1    | 0     | 0     | -1    | -2  | -22   | 12520 |     |
| -11   | -2    | 26    | 4     | -4    | 5     | -3    | 2     | -1    | 1     | -1    | 1     | -1    | 1     | -1    | 2     | -4    | 6     | -23   | -3    | -1    | 0     | 0     | -1  | -3    | -22   |     |

Fig. S5 Site Hamiltonian used for the modelling. The B850 ring block is in purple, the B800 block is in red.

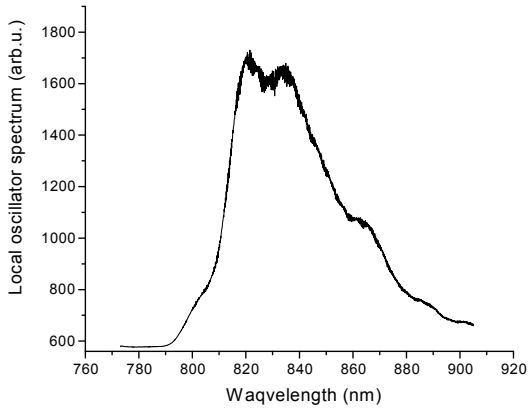

Fig. S6 Pulse spectrum used for the broadband P-P experiment

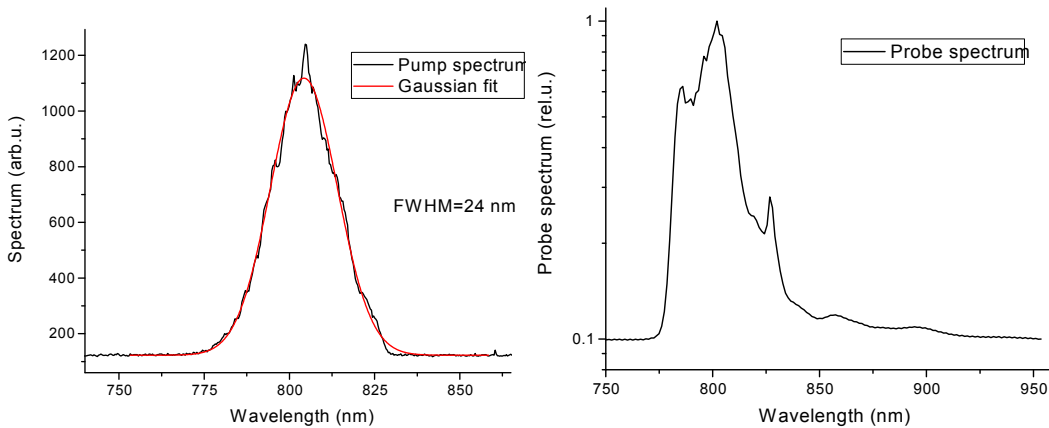

(a) Pump spectrum

(b) Probe spectrum

Fig. S7 Pulse spectra used for the narrowband P-P experiment
